# Supplementary material for: Regulation of the Expression of the Vibrio parahaemolyticus peuA Gene Encoding an Alternative Ferric Enterobactin Receptor
Source: PubMed Central journal article supplement (PMC4141801; doi:10.1371/journal.pone.0105749), 2014-08-22
Supplement: pone.0105749.s003.pdf [file pone.0105749.s003.pdf]

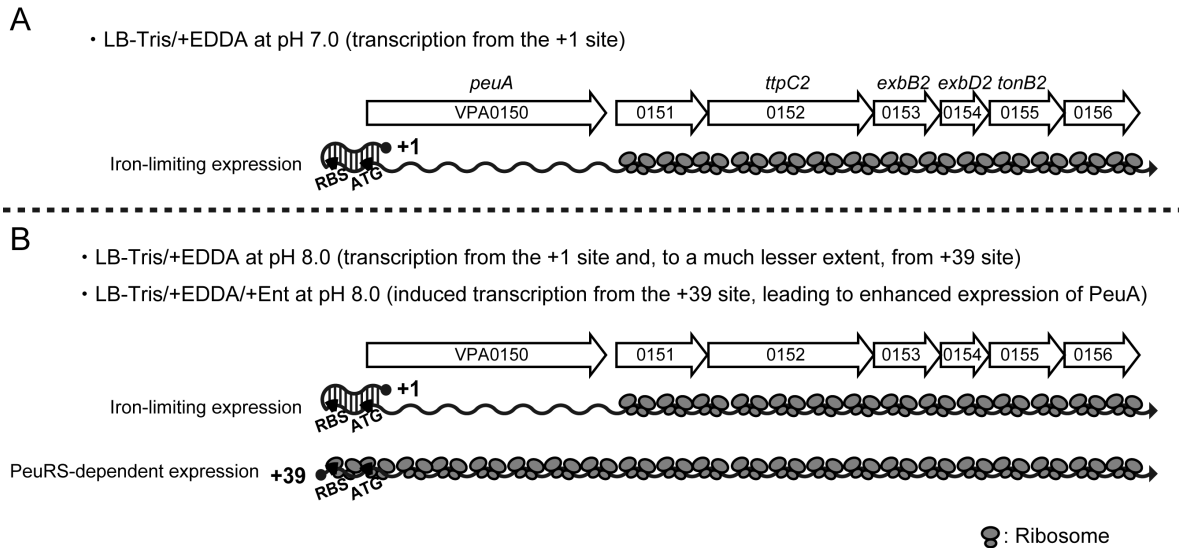

**Figure S3. Proposed expression mechanism for *V. parahaemolyticus* PeuA ferric Ent receptor under iron-limiting conditions in response to extracellular alkaline pH and Ent.** Thick arrows and wavy arrows represent the open reading frames and the direction of transcription and mRNAs, respectively. (A) Under iron-limiting conditions at pH 7.0, *peuA* is co-transcribed with *VPA0151-VPA0156* from the +1 transcription start site. However, the transcript from the +1 site forms a secondary structure within its 5'-UTR, leading to inhibition of translation of the *peuA* mRNA, although the remaining *VPA0151-VPA0156* mRNA is translated. (B) Under iron-limiting conditions at pH 8.0 in the absence of Ent, transcription of the *peuA/VPA0151-VPA0156* operon from the +39 site also occurs to a slight extent, combined with normal transcription beginning at the +1 site. The presence of Ent under iron-limiting conditions at pH 8.0 is proposed to result in induction of transcription from the +39 site, and thereby leads to enhanced expression of the ferric Ent receptor PeuA, because the RBS and start codon of *peuA* in the +39 transcript are available for translation initiation. The *peuA* gene, therefore, is optimally expressed under iron-limiting conditions in response to extracellular alkaline pH and Ent. In addition, the two-component regulatory system, PeuRS, is proposed to be necessary to activate *peuA* transcription in response to these signals.
