# Supplementary material for: Regulation of the Expression of the Vibrio parahaemolyticus peuA Gene Encoding an Alternative Ferric Enterobactin Receptor
Source: PubMed Central journal article supplement (PMC4141801; doi:10.1371/journal.pone.0105749), 2014-08-22
Supplement: pone.0105749.s004.pdf [file pone.0105749.s004.pdf]

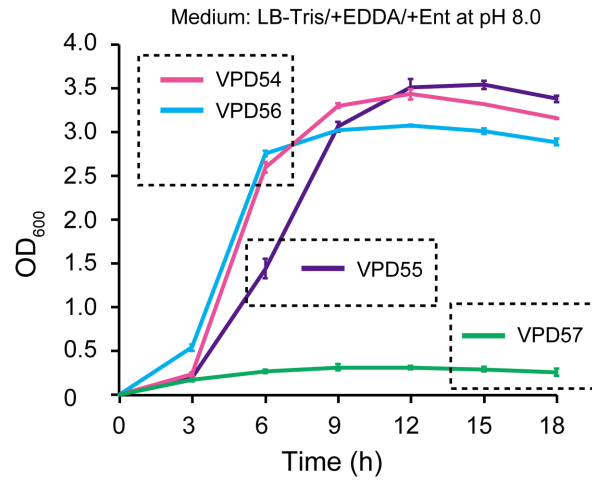

**Figure S4. Growth assays of the VPD54, VPD55, VPD56, and VPD57 mutants in LB-Tris/+EDDA/+Ent medium at pH 8.0.** The growth assay was performed as described in Figure 1. Data are shown as means  $\pm$  SD from 3 separate experiments.
