# Supplementary material for: Regulation of the Expression of the Vibrio parahaemolyticus peuA Gene Encoding an Alternative Ferric Enterobactin Receptor
Source: PubMed Central journal article supplement (PMC4141801; doi:10.1371/journal.pone.0105749), 2014-08-22
Supplement: pone.0105749.s005.pdf [file pone.0105749.s005.pdf]

**Table S1. Plasmids used in this study**

| Plasmid      | Description*                                                                                                            | Reference or source |
|--------------|-------------------------------------------------------------------------------------------------------------------------|---------------------|
| pXAC623      | Suicide vector derived from pKTN701 containing the <i>sacB</i> gene of <i>B. subtilis</i> ; Cm <sup>r</sup>             | [1]                 |
| pRK415       | Broad-host-range plasmid (~10.5 kb); Tc <sup>r</sup>                                                                    | [2]                 |
| pXACΔpeuA    | pXAC623 containing a 1,315-bp <i>XhoI/SalI-XbaI</i> fragment with a 1,646-bp deletion in <i>peuA</i> ; Cm <sup>r</sup>  | This study          |
| pXACΔpeuRS   | pXAC623 containing a 1,391-bp <i>XbaI-XbaI</i> fragment with a 1,654-bp deletion in <i>peuA</i> ; Cm <sup>r</sup>       | This study          |
| pXACΔtonB1   | pXAC623 containing a 1,259-bp <i>SacI-SacI</i> fragment with a 507-bp deletion in <i>tonB1</i> ; Cm <sup>r</sup>        | [3]                 |
| pXACΔtonB2   | pXAC623 containing a 1,198-bp <i>SacI-SacI</i> fragment with a 504-bp deletion in <i>tonB2</i> ; Cm <sup>r</sup>        | [3]                 |
| pXACΔtonB3   | pXAC623 containing a 1,466-bp <i>SacI-SacI</i> fragment with a 511-bp deletion in <i>tonB3</i> ; Cm <sup>r</sup>        | [3]                 |
| pXACΔpvuA1   | pXAC623 containing a 1,151-bp <i>XbaI-XhoI/SalI</i> fragment with a 1,657-bp deletion in <i>pvuA1</i> ; Cm <sup>r</sup> | [3]                 |
| pXACΔpvuA2   | pXAC623 containing a 1,281-bp <i>XbaI-XhoI/SalI</i> fragment with a 1,712-bp deletion in <i>pvuA2</i> ; Cm <sup>r</sup> | [3]                 |
| pXACΔhutA    | pXAC623 containing a 1,713-bp <i>KpnI-KpnI</i> fragment with a 1,889-bp deletion in <i>hutA</i> ; Cm <sup>r</sup>       | This study          |
| pXACΔfhuA    | pXAC623 containing a 2,252-bp <i>XhoI/SalI-XbaI</i> fragment with a 1,221-bp deletion in <i>fhuA</i> ; Cm <sup>r</sup>  | This study          |
| pXACΔiutA    | pXAC623 containing a 1,436-bp <i>XbaI-XhoI/SalI</i> fragment with a 1,951-bp deletion in <i>iutA</i> ; Cm <sup>r</sup>  | This study          |
| pXACΔVP0168  | pXAC623 containing a 1,107-bp <i>XbaI-XbaI</i> fragment with a 1,220-bp deletion in <i>VP0168</i> ; Cm <sup>r</sup>     | This study          |
| pRK415-peuA  | pRK415 containing a 2,960-bp <i>XbaI-XbaI</i> fragment with full-length <i>peuA</i> ; Tc <sup>r</sup>                   | This study          |
| pRK415-peuRS | pRK415 containing a 3,045-bp <i>XbaI-XbaI</i> fragment with full-length <i>peuRS</i> ; Tc <sup>r</sup>                  | This study          |

\*Ap<sup>r</sup>, ampicillin resistance; Cm<sup>r</sup>, chloramphenicol resistance; Tc<sup>r</sup>, tetracycline resistance

## References

1. Kuroda T, Mizushima T, Tsuchiya T (2005) Physiological roles of three Na<sup>+</sup>/H<sup>+</sup> antiporters in the halophilic bacterium *Vibrio parahaemolyticus*. *Microbiol Immunol* 49: 711-719.
2. Keen NT, Tamaki S, Kobayashi D, Trollinger D (1988) Improved broad-host-range plasmids for DNA cloning in gram-negative bacteria. *Gene* 70: 191-197.
3. Tanabe T, Funahashi T, Okajima N, Nakao H, Takeuchi Y et al. (2011) The *Vibrio parahaemolyticus* *pvuA1* gene (formerly termed *psuA*) encodes a second ferric vibrioferrin receptor that requires *tonB2*. *FEMS Microbiol Lett* 324: 73-79.
